# Supplementary material
Source: MDPI journal article supplement (https://www.mdpi.com/2673-4834/3/3/54)
Supplement: s1 [file s1]

Archive with 1 entries (1 files):
- earth-1808284-supplementary.pdf
